# Supplementary material for: Calcium intake and risk of fracture: systematic review
Source: PubMed Central journal article supplement — BMJ. 2015 Sep 29;351:h4580. doi: 10.1136/bmj.h4580 (PMC4784799; doi:10.1136/bmj.h4580), 2015-09-29
Supplement: bolm026208.ww1_default.pdf [file bolm026208.ww1_default.pdf]

## Appendix 1: Supplementary information [posted as supplied by author]

### Literature searches

#### Ovid Medline search July 2013

1. Randomized Controlled Trials as Topic/
2. randomized controlled trial.pt. or randomi?ed controlled trial.mp. or Randomized Controlled Trial/
3. controlled clinical trial.pt. or Controlled Clinical Trial/
4. Random Allocation/
5. Double-Blind Method/
6. Single-Blind Method/
7. clinical trial.pt. or exp Clinical Trials/
8. multicenter study.pt. or multicenter study.tw.
9. or/1-8
10. (clinical adj trial\$.tw.
11. ((singl\$ or doubl\$ or trebl\$ or tripl\$) adj (mask\$ or blind\$)).tw.
12. placebo\$.tw. or Placebos/ or (control adj (arm or group)).tw.
13. (allocat\$ adj2 random\$).tw.
14. or/10-13
15. 9 or 14
16. case report.tw.
17. letter/
18. historical article/
19. or/16-18
20. 15 not 19
21. Epidemiologic studies/
22. (case control or case-control).tw. or exp case control studies/
23. cohort.tw. or exp Cohort Studies/
24. (Follow up or follow-up).tw. or Follow-Up Studies/
25. (observational adj (study or studies)).tw.
26. Longitudinal.tw. or Longitudinal Studies/
27. (prospective adj (study or studies)).tw. or Prospective Studies/
28. (retrospective adj (study or studies)).tw. or Retrospective Studies/
29. ((cross sectional or cross-sectional) adj (study or studies or analy\$)).tw. or Cross-Sectional Studies/
30. ((cross-over or crossover) adj (study or studies)).tw. or Cross-Over Studies/
31. risk factor\$.tw. or Risk factors/
32. exp Calcium, Dietary/
33. milk.tw. or Milk/
34. (dairy or cheese).tw. or dairy products/ or butter/ or cheese/ or ice cream/ or margarine/
35. yoghurt.tw. or cultured milk products/ or yoghurt/
36. Milk Substitutes/ or Soy Milk/
37. calcium.tw. or exp Calcium/
38. (calcium adj3 supplement\$).mp.
39. Dietary Supplements/ and calcium.mp.
40. calcium carbonate\$.mp. or exp Calcium Carbonate/
41. calcium citrate\$.mp. or exp Calcium Citrate/
42. calcium phosphate\$.mp. or exp Calcium Phosphates/

43. calcium gluconate\$.mp. or exp Calcium Gluconate/
44. hydroxyapatite\$.mp. or exp Hydroxyapatites/
45. fracture\$.tw. or exp Fractures, Bone/
46. osteopor\$.tw. or Osteoporosis/ or Osteoporosis, Postmenopausal/
47. (bone density or BMD).tw. or Bone Density/
48. bone mineral density.tw.
49. (bone adj (mass or strength or loss or accret\$ or remodel\$ or resorp\$)).tw.
50. (bone mineral content or BMC).tw.
51. (cardiovascular adj (disease\$ or event\$ or acute)).tw.
52. isch\$ heart disease\$.tw. or Myocardial Ischemia/
53. (acute coronary syndrome or ACS).tw. or Acute Coronary Syndrome/
54. unstable angina.tw. or Angina, Unstable/
55. coronary artery disease\$.tw. or Coronary Artery Disease/
56. (myocardial infarct\$ or MI or AMI).tw. or Myocardial Infarction/
57. (cerebrovascular adj (accident\$ or disease\$ or acute)).tw. or exp Cerebrovascular Accident/
58. stroke\$.tw. or exp Stroke/
59. mortality.tw. or Mortality/ or Hospital Mortality/ or Mortality, Premature/
60. fatal outcome.tw. or Fatal Outcome/
61. death\$.tw. or Death/ or Cause of Death/ or Death, Sudden, Cardiac/
62. cancer\$.tw. or exp Neoplasms/dh, pc, et, di, ep
63. ((risk\$ or occurrence\$ or case\$ or incidence) adj3 (cancer\$ or neoplasm\$ or malignan\$ or adenocarcinom\$ or carcinom\$ or melanom\$ or lymphom\$ or leuk?emi\$ or myelodysplas\$ or myelom\$ or sarcom\$)).tw.
64. ((breast or prostate or colo\$ or rect\$) adj3 (neoplasm\$ or cancer\$ or tumor\$ or malignan\$ or carcinom\$ or adenocarcinom\$)).tw.
65. Breast Neoplasms/
66. Prostatic Neoplasms/
67. Colonic Neoplasms/ or Colorectal Neoplasms/
68. Adenomatous Polyps/ or Colonic Polyps/ or Intestinal Polyps/
69. ((colo\$ or rect\$) adj3 (adenoma\$ or polyp\$)).tw.
70. (weight adj2 (body or gain or increas\$ or rise\$ or rose or loss or reduc\$ or fall or fell or change)).tw. or Weight Loss/
71. blood pressure.tw. or Blood Pressure/
72. Hypertension/ or hypertension.tw.
73. cholesterol.tw. or Cholesterol/ or Cholesterol, Dietary/
74. Cholesterol, VLDL/ or Cholesterol, LDL/ or Cholesterol,HDL/
75. ((serum or blood) adj calcium).tw.
76. ((kidney or renal) adj (calcul\$ or stone\$ or lithiasis)).tw. or Kidney Calculi/
77. ((gastrointestinal or GI) adj (discomfort or side-effect\$ or side effect\$)).tw.
78. ((abdominal or stomach) adj (pain or cramp\$)).tw. or Abdominal Pain/
79. constipation.tw. or Constipation/
80. indigestion.tw. or Dyspepsia/
81. Diarrhea/ or diarrhea.tw.
82. Flatulence/ or bloating.tw.
83. or/20-31
84. or/32-44
85. or/45-82

86. and/83-85
  87. limit 86 to english language
  88. limit 87 to animal
  89. limit 87 to human
  90. 88 not 89
  91. 87 not 90
  92. \*Dialysis/ or \*hemodialysis/ or \*peritoneal dialysis/
  93. 91 not 92
  94. limit 93 to (addresses or bibliography or biography or comment or congresses or consensus development conference or consensus development conference, nih or dictionary or directory or duplicate publication or editorial or in vitro or interview or lectures or letter or news or newspaper article or "review")
  95. 93 not 94
  96. limit 95 to ("all adult (19 plus years)" or "middle age (45 to 64 years)" or "middle aged (45 plus years)" or "all aged (65 and over)" or "aged (80 and over)")
- Pubmed search September 2014  
(dietary calcium OR calcium intake OR milk OR dairy OR calcium supplement\* OR calcium supplement) AND (fracture OR bone density OR bone mineral)

### **List of superseded reports of cohort studies**

1. Kelsey JL, Browner WS, Seeley DG, Nevitt MC, Cummings SR. Risk factors for fractures of the distal forearm and proximal humerus. The Study of Osteoporotic Fractures Research Group. Am J Epidemiol 1992;135:477-89.
2. Cummings SR, Nevitt MC, Browner WS, Stone K, Fox KM, Ensrud KE, et al. Risk factors for hip fracture in white women. Study of Osteoporotic Fractures Research Group. N Engl J Med 1995;332:767-73.
3. van Geel ACM, Geusens PP, Nagtzaam IF, Schreurs CMJR, van der Voort DJM, Rinkens PELM, et al. Timing and risk factors for clinical fractures among postmenopausal women: A 5-year prospective study. BMC Med 2006;4.1.
4. Center JR, Bliuc D, Nguyen TV, Eisman JA. Risk of subsequent fracture after low-trauma fracture in men and women. JAMA 2007;297:387-94.
