# Supplementary material for: Calcium intake and risk of fracture: systematic review
Source: PubMed Central journal article supplement — BMJ. 2015 Sep 29;351:h4580. doi: 10.1136/bmj.h4580 (PMC4784799; doi:10.1136/bmj.h4580), 2015-09-29
Supplement: bolm026208.ww3_default.pdf [file bolm026208.ww3_default.pdf]

**Appendix 3: Supplementary table [posted as supplied by author]**

**Table A:** Calcium intake and vitamin D status of participants in randomised controlled trials of calcium intake reporting fractures

| <b>Trial</b>                      | <b>Dietary calcium (mg/d)</b> | <b>Baseline 25OHD (nmol/L)</b> | <b>Achieved 25OHD Calcium group (nmol/)</b> | <b>Achieved 25OHD Controls (nmol/)</b> |
|-----------------------------------|-------------------------------|--------------------------------|---------------------------------------------|----------------------------------------|
| Inkovaara 1983 <sup>13</sup>      |                               |                                |                                             |                                        |
| Hansson 1987 <sup>73</sup>        |                               |                                |                                             |                                        |
| Chapuy 1992,1994 <sup>15,16</sup> | 513 (165)                     | 36 (25)                        | 105 (28)                                    | 28 (18)                                |
| Reid 1993 <sup>74,75</sup>        | 750 (290)                     | 94 (39)                        |                                             |                                        |
| Chevalley 1994 <sup>21</sup>      | 619 (318)                     | 60 (30)                        |                                             |                                        |
| Recker 1996 <sup>76</sup>         | 433 (193)                     | 64 (19)                        |                                             |                                        |
| Dawson-Hughes 1997 <sup>77</sup>  | 730 (349)                     | 74 (33)                        | 112 (37)                                    | 69 (29)                                |
| Riggs 1998 <sup>78</sup>          | 714 (286)                     | 75 (26)                        |                                             |                                        |
| Baron 1999 <sup>79,80</sup>       | 877 (437)                     | 73 (27)                        |                                             |                                        |
| Ruml 1999 <sup>81</sup>           | 613 (189)                     |                                |                                             |                                        |
| Peacock 2000 <sup>82</sup>        | 597 (291)                     | 62 (27)                        |                                             |                                        |
| Lau 2001 <sup>20</sup>            | 477 (230)                     |                                |                                             |                                        |
| Chapuy 2002 <sup>83</sup>         | 557 (238)                     | 22 (16)                        | 77                                          | 15                                     |
| Avenell 2004 <sup>84</sup>        |                               |                                |                                             |                                        |
| Fujita 2004 <sup>85</sup>         | 600                           |                                |                                             |                                        |
| Harwood 2004 <sup>86</sup>        |                               | 29                             | 47                                          | 33                                     |
| Larsen 2004 <sup>14</sup>         |                               | 36 (19)                        | 47 (20)                                     | 38 (18)                                |
| Grant 2005 <sup>87</sup>          |                               | 38 (16)                        | +24 (CaD), +4 (Ca)                          | +24 (D), +8 (P)                        |
| Porthouse 2005 <sup>88</sup>      | 1079 (341)                    |                                |                                             |                                        |
| Jackson 2006 <sup>9</sup>         | 1151 (656) <sup>a</sup>       | 48                             | +28%                                        |                                        |
|                                   |                               | 67 winter/ 87 summer           |                                             |                                        |
| Prince 2006 <sup>89</sup>         | 915 (335)                     |                                |                                             |                                        |
| Reid 2006 <sup>90</sup>           | 857 (386)                     | 52 (19)                        |                                             |                                        |
| Bolton-Smith 2007 <sup>91</sup>   | 1073 (264)                    | 60 (15)                        | 75 (15)                                     | 49 (13)                                |
| Bonnick 2007 <sup>92</sup>        | 1242 (580)                    |                                |                                             |                                        |
| Reid 2008 <sup>93</sup>           | 867 (452)                     | 92 (33)                        |                                             |                                        |
| Salovaara 2010 <sup>94</sup>      | 957 (486)                     | 50 (18)                        | 75 (22)                                     | 56 (22)                                |
| Sambrook 2012 <sup>18</sup>       |                               | 34 (17)                        |                                             |                                        |

Data are mean (SD) unless stated

<sup>a</sup> includes non-protocol, personal calcium supplements

Abbreviations: 25OHD- 25hydroxyvitamin D; Ca- calcium group; CaD co-administered calcium and vitamin D; D- vitamin D; P- placebo

**Table B:** Risk of bias assessment for randomised controlled trials

| Trial                             | Random Sequence generation described | Allocation concealment | Blinding of participant/ personnel | Blinding of outcome assessment | Incomplete outcome data | Differential drop out | Other bias       | Primary endpoint | Funding             | Investigator conflict of interest | Overall assessment of risk of biasa |
|-----------------------------------|--------------------------------------|------------------------|------------------------------------|--------------------------------|-------------------------|-----------------------|------------------|------------------|---------------------|-----------------------------------|-------------------------------------|
| Inkovaara 1983 <sup>13</sup>      | Quasi (DOB)                          | Yes                    | Double-blind                       | Yes                            | No                      | No                    | Yes <sup>b</sup> | No               | NS                  | Yes                               | High                                |
| Hansson 1987 <sup>73</sup>        | NS                                   | NS                     | NS                                 | NS                             | No                      | No                    | No               | No               | IF                  | NS                                | Moderate                            |
| Chapuy 1992,1994 <sup>15,16</sup> | NS                                   | NS                     | NS                                 | NS                             | No                      | No                    | Yes <sup>c</sup> | Yes              | IF, Tab             | NS                                | Moderate                            |
| Reid 1993,1995 <sup>74,75</sup>   | NS                                   | NS                     | Double-blind                       | Yes                            | No                      | No                    | Yes <sup>d</sup> | No               | IF, Tab             | NS                                | Moderate                            |
| Chevalley 1994 <sup>21</sup>      | NS                                   | NS                     | Double-blind                       | Yes                            | No                      | No                    | No               | No               | IF, Tab<br>IF, Ind, | No                                | Moderate                            |
| Recker 1996 <sup>76</sup>         | NS                                   | NS                     | Double-blind                       | Yes                            | Yes                     | NS                    | No               | Yes              | Tab                 | Yes                               | High                                |
| Dawson-Hughes 1997 <sup>77</sup>  | NS                                   | NS                     | Double-blind                       | Yes                            | Yes                     | No                    | No               | No               | IF                  | NS                                | High                                |
| Riggs 1998 <sup>78</sup>          | NS                                   | NS                     | Double-blind                       | Yes                            | No                      | No                    | No               | No               | IF, Tab             | NS                                | Moderate                            |
| Baron 1999 <sup>79,80</sup>       | Yes                                  | Yes                    | Double-blind                       | Yes                            | No                      | No                    | No               | No               | IF, Tab             | No                                | Moderate                            |
| Ruml 1999 <sup>81</sup>           | NS                                   | NS                     | Double-blind                       | Yes                            | No                      | Yes                   | No               | No               | IF, Tab<br>IF, Ind, | No                                | High                                |
| Peacock 2000 <sup>82</sup>        | NS                                   | NS                     | Double-blind                       | Yes                            | Yes                     | No                    | No               | No               | Tab                 | NS                                | High                                |
| Lau 2001 <sup>20</sup>            | NS                                   | NS                     | No                                 | NS                             | No                      | Yes                   | No               | No               | Ind                 | NS                                | High                                |
| Chapuy 2002 <sup>83</sup>         | NS                                   | NS                     | Double blind                       | Yes                            | Yes                     | No                    | Yes <sup>e</sup> | No               | Ind                 | Yes                               | High                                |
| Avenell 2004 <sup>84</sup>        | NS                                   | NS                     | No                                 | Yes                            | No                      | Yes                   | No               | No               | IF, Tab             | NS                                | High                                |
| Fujita 2004 <sup>85</sup>         | NS                                   | NS                     | Double-blind                       | Yes                            | Yes                     | No                    | No               | No               | NS                  | NS                                | High                                |
| Harwood 2004 <sup>86</sup>        | Yes                                  | Yes                    | No                                 | No                             | No                      | Yes                   | Yes <sup>f</sup> | No               | Ind                 | NS                                | High                                |
| Larsen 2004 <sup>14</sup>         | Quasi (location)                     | No                     | No                                 | Yes                            | No                      | No                    | No               | Yes              | IF, Tab             | No                                | High                                |
| Grant 2005 <sup>87</sup>          | Yes                                  | Yes                    | Double blind                       | Yes                            | No                      | No                    | No               | Yes              | IF, Tab             | Yes                               | Low                                 |
| Porthouse 2005 <sup>88</sup>      | Yes                                  | Yes                    | No                                 | No                             | No                      | No                    | No               | Yes              | IF, Tab             | Yes                               | Moderate                            |
| Jackson 2006 <sup>9</sup>         | NS                                   | NS                     | Double-blind                       | Yes                            | No                      | No                    | Yes <sup>g</sup> | Yes              | IF, Tab             | Yes                               | High (hip)                          |

| Trial                           | Random Sequence generation described | Allocation concealment | Blinding of participant/ personnel | Blinding of outcome assessment | Incomplete outcome data | Differential drop out | Other bias       | Primary endpoint | Funding | Investigator conflict of interest | Overall assessment of risk of bias <sup>a</sup> |
|---------------------------------|--------------------------------------|------------------------|------------------------------------|--------------------------------|-------------------------|-----------------------|------------------|------------------|---------|-----------------------------------|-------------------------------------------------|
|                                 |                                      |                        |                                    |                                |                         |                       |                  |                  |         |                                   | Low (others)                                    |
| Prince 2006 <sup>89</sup>       | Yes                                  | Yes                    | Double-blind                       | Yes                            | No                      | No                    | No               | Yes              | IF      | No                                | Low                                             |
| Reid 2006 <sup>90</sup>         | Yes                                  | Yes                    | Double-blind                       | Yes                            | No                      | No                    | No               | Yes              | IF, Tab | NS                                | Low                                             |
| Bolton-Smith 2007 <sup>91</sup> | Yes                                  | NS                     | Double-blind                       | Yes                            | No                      | Yes                   | Yes <sup>f</sup> | No               | IF, Tab | No                                | High                                            |
| Bonnick 2007 <sup>92</sup>      | NS                                   | NS                     | Double-blind                       | Yes                            | No                      | No                    | Yes <sup>f</sup> | No               | Ind     | Yes                               | High                                            |
| Reid 2008 <sup>93</sup>         | Yes                                  | Yes                    | Double-blind                       | Yes                            | No                      | No                    | No               | No               | IF, Tab | Yes                               | Moderate                                        |
| Salovaara 2010 <sup>94</sup>    | Yes                                  | NS                     | No                                 | No                             | No                      | No                    | No               | Yes              | IF, Tab | No                                | Moderate                                        |
| Sambrook 2012 <sup>18</sup>     | Yes                                  | Yes                    | No                                 | No                             | No                      | No                    | No               | No               | IF      | No                                | High                                            |

<sup>a</sup> For each study, we assessed an overall risk of bias based on the features of the study design in the Table. We gave the greatest weighting in assessing a study as higher risk to quasi-randomisation, lack of blinding, incomplete outcome data (eg per-protocol analysis) or differential drop out, lack of fracture as primary endpoint/small size of study, and other specific biases as described in the Table. Thus, low risk studies were randomised, double-blind, placebo-controlled studies with fracture as the primary endpoint and without other important potential biases. Funding source and conflict of interests were not included in our assessment.

<sup>b</sup> Unclear whether total fracture events or number of participants with a fracture

<sup>c</sup> Methods describe cluster trial where participants were randomly assigned in groups of four but analysis performed as if participants individually randomised

<sup>d</sup> Includes data from two year extension trial that 86/122 participants completing the original two-year trial entered

<sup>e</sup> baseline group numbers are inconsistently reported throughout the text

<sup>f</sup> Fractures were self-reported and not verified

<sup>g</sup> Interaction between hormone treatment, calcium and vitamin D treatment, and risk of hip fracture reported in 2013 (see text)

Abbreviations- DOB- quasi-randomized by date of birth; NS- not stated; IF- funding by grants from independent funders; Ind- funded by grants from industry and/or run by industry; Tab- study tablets provided by pharmaceutical company.

**Table C:** Selected characteristics of cohort studies

| Study                             | Study name      | Baseline calcium intake (mg/d) | Baseline milk intake | Baseline dairy intake | Calcium supplement usage (%) | Method of estimate intake | Duration of recall/ FFQ | Method of analysis | Covariates adjusted for |
|-----------------------------------|-----------------|--------------------------------|----------------------|-----------------------|------------------------------|---------------------------|-------------------------|--------------------|-------------------------|
| Riggs 1982 <sup>22</sup>          |                 | NS                             | NS                   | NS                    | 38                           | NS                        | NS                      | Rates              | 0                       |
| Holbrook 1988 <sup>23</sup>       | Rancho Bernardo | 691                            | NS                   | NS                    | NS                           | Diet recall               | 24 h                    | CPH                | 5-9                     |
| Wickham 1989 <sup>24</sup>        | DHSS            | 801                            | NS                   | NS                    | NS                           | Dietary record            | 7 d                     | LR                 | 2-4                     |
| Paganini-Hill 1991 <sup>25</sup>  | Leisure World   | 371                            | NS                   | NS                    | NS                           | FFQ                       | 1 y                     | PR                 | Age                     |
| Looker 1993 <sup>26</sup>         | NHANES 1        | 645                            | NS                   | NS                    | NS                           | Diet recall               | 24 h                    | CPH                | 5-9                     |
| Huang 1996 <sup>27</sup>          | NHANES 1        | 592                            | NS                   | 10 serve/w            | NS                           | FFQ/ diet recall          | 3 m                     | CPH                | Age                     |
| Mussolino 1998 <sup>32</sup>      | NHANES 1        | 788                            | NS                   | NS                    | NS                           | NS                        | NS                      | CPH                | ≥10                     |
| Cumming 1997 <sup>28</sup>        | SOF             | 714                            | <1 gl/d              | NS                    | 43                           | FFQ                       | 1 y                     | CPH                | ≥10                     |
| Fujiwara 1997 <sup>29</sup>       | AHS             | 550                            | 2-4 gl/w             | NS                    | NS                           | FFQ                       | NS                      | PR                 | 5-9                     |
| Meyer 1997 <sup>30</sup>          |                 | 712                            | NS                   | NS                    | NS                           | FFQ                       | NS                      | CPH                | 5-9                     |
| Owusu 1997 <sup>31</sup>          | HPFS            | NS                             | NS                   | NS                    | 16                           | FFQ                       | 1 y                     | LR                 | 5-9                     |
| Munger 1999 <sup>33</sup>         | IWHS            | 843                            | NS                   | NS                    | NS                           | FFQ                       | 12 m                    | TT                 | 0                       |
| Honkanen 2000 <sup>34</sup>       | Kuopio          | 830                            | NS                   | NS                    | NS                           | FFQ                       | NS                      | CPH                | 5-9                     |
| Huopio 2000 <sup>35</sup>         | Kuopio          | 795                            | NS                   | NS                    | NS                           | NS                        | NS                      | CPH                | 5-9                     |
| Kato 2000 <sup>36</sup>           | NYU WHS         | NS                             | NS                   | NS                    | NS                           | Questionnaires            | NS                      | CPH                | Age                     |
| Nguyen 2001 <sup>37</sup>         | Dubbo           | 631                            | NS                   | NS                    | NS                           | FFQ                       | NS                      | CPH                | 2-4                     |
| Nguyen 2007 <sup>52</sup>         | Dubbo           | 576                            | NS                   | NS                    | NS                           | FFQ                       | NS                      | NS                 | NS                      |
| Meier 2008 <sup>55</sup>          | Dubbo           | 635                            | NS                   | NS                    | NS                           | NS                        | NS                      | CPH                | 5-9                     |
| Dargent-Molina 2002 <sup>38</sup> | Epidos          | NS                             | NS                   | NS                    | NS                           | NS                        | NS                      | NS                 | NS                      |
| Albrand 2003 <sup>39</sup>        | OFELY           | 822                            | NS                   | NS                    | NS                           | FFQ                       | NS                      | TT                 | 0                       |
| Feskanich 2003 <sup>40</sup>      | NHS             | 730                            | 240 ml/d             | NS                    | 14                           | FFQ                       | 1 y                     | CPH                | ≥10                     |
| Michaelsson 2003 <sup>41</sup>    | SMC             | 749                            | NS                   | NS                    | NS                           | FFQ                       | 6 m                     | CPH                | Age                     |
| Warensjo 2011 <sup>53</sup>       | SMC             | 911                            | NS                   | NS                    | 6                            | FFQ                       | NS                      | CPH                | ≥10                     |
| Melton 2003 <sup>42</sup>         | Rochester       | NS                             | NS                   | NS                    | NS                           | Dietary recall            | 7 d                     | CPH                | Age                     |
| Roy 2003 <sup>43</sup>            | EPOS            | NS                             | <1 gl/d              | NS                    | NS                           | FFQ                       | NS                      | PR                 | 2                       |
| van der Klift 2004 <sup>44</sup>  | Rotterdam       | 1131                           | NS                   | NS                    | NS                           | FFQ                       | 12 m                    | TT                 | 0                       |
| Kanis 2005 <sup>45</sup>          | Meta-analysis   | NS                             | NS                   | NS                    | NS                           | Varied                    | Varied                  | PR                 | 5-9                     |
| Papaioannou 2005 <sup>46</sup>    | CaMOs           | NS                             | NS                   | NS                    | NS                           | FFQ                       | 1y                      | CPH                | ≥10                     |
| Cauley 2007 <sup>47</sup>         | WHI             | NS                             | NS                   | NS                    | NS                           | NS                        | NS                      | CPH                | 0                       |
| Prentice 2013 <sup>67</sup>       | WHI OS          | 738                            | NS                   | NS                    | 46                           | SFQ                       | At baseline             | CPH                | ≥10                     |
| Diez-Perez 2007 <sup>48</sup>     | ECOSAP          | 881                            | NS                   | NS                    | NS                           | NS                        | NS                      | CPH                | 5-9                     |
| Key 2007 <sup>49</sup>            | Epic-Oxford     | 1007                           | NS                   | NS                    | 15                           | FFQ                       | 12 m                    | CPH                | ≥10                     |
| Kung 2007 <sup>50</sup>           | Hong Kong       | 679                            | NS                   | NS                    | NS                           | FFQ                       | NS                      | CPH                | ≥10                     |
| Lewis 2007 <sup>51</sup>          | MrOs            | NS                             | NS                   | NS                    | NS                           | FFQ                       | NS                      | TT                 | 0                       |
| Van Geel 2007 <sup>53</sup>       | Maastricht      | 877                            | NS                   | NS                    | NS                           | NS                        | NS                      | CPH                | 0                       |
| Dargent-Molina 2008 <sup>54</sup> | E3N             | 1045                           | NS                   | NS                    | NS                           | FFQ                       | NS                      | CPH                | ≥10                     |
| Nieves 2008 <sup>56</sup>         | NORA            | 600                            | NS                   | NS                    | 60                           | FFQ                       | NS                      | LR                 | 5-9                     |
| Koh 2009 <sup>57</sup>            | SCHS            | NS                             | NS                   | NS                    | 3                            | FFQ                       | NS                      | CPH                | ≥10                     |
| Nakamura 2009 <sup>58</sup>       | JPHC            | 415                            | NS                   | NS                    | NS                           | FFQ                       | 1 m                     | LR                 | 5-9                     |
| Thomas-John 2009 <sup>59</sup>    | CVAMC           | NS                             | NS                   | NS                    | 12                           | NS                        | NS                      | Uni                | 0                       |
| Gronskag 2010 <sup>60</sup>       | HUNT            | NS                             | >1 gl/d              | NS                    | NS                           | NS                        | NS                      | NS                 | 5-9                     |
| Benetou 2011 <sup>61</sup>        | EPIC            | 736-1083                       | NS                   | NS                    | NS                           | FFQ                       | 1 y                     | CPH                | 5-9                     |
| Nakamura 2011 <sup>62</sup>       | Muramatsu       | 586                            | NS                   | NS                    | NS                           | FFQ                       | NS                      | CPH                | 5-9                     |
| Khan 2012 <sup>64</sup>           | MCCS            | NS                             | NS                   | NS                    | NS                           | FFQ                       | NS                      | CPH                | NS                      |
| Rouzi 2012 <sup>65</sup>          | CEOR            | 532                            | NS                   | NS                    | NS                           | FFQ                       | NS                      | LR                 | 5-9                     |

| Study                        | Study name           | Baseline calcium intake (mg/d) | Baseline milk intake | Baseline dairy intake | Calcium supplement usage (%) | Method of estimate intake | Duration of recall/ FFQ | Method of analysis | Covariates adjusted for |
|------------------------------|----------------------|--------------------------------|----------------------|-----------------------|------------------------------|---------------------------|-------------------------|--------------------|-------------------------|
| Feart 2013 <sup>66</sup>     | 3 Cities             | NS                             | 4 serve/w            | 18 serve/w            | NS                           | FFQ/ dietary recall       | NS                      | CPH                | ≥10                     |
| Samieri 2013 <sup>68</sup>   | 3 Cities             | 863                            | NS                   | NS                    | 9                            | FFQ/ dietary recall       | NS                      | CPH                | 0                       |
| Sahni 2013 <sup>69</sup>     | Framingham offspring | 829                            | 6 serve/w            | 10 serve/w            | 22                           | FFQ                       | 1 y                     | CPH                | ≥10                     |
| Domiciano 2014 <sup>70</sup> | SPAH                 | NS                             | NS                   | 437 mg/d              | 6                            | NS                        | NS                      | TT                 | 0                       |
| Sahni 2014 <sup>71</sup>     | Framingham           | 726                            | 6 serve/w            | NS                    | 17                           | FFQ                       | 1 y                     | CPH                | ≥10                     |

Data are mean, median, range or percentage.

Abbreviations: Study name –refer to original references. GI- glass; serve- servings; w- week; m month; h- hour; FFQ- food frequency questionnaire; SFQ supplement frequency questionnaire. Rates –comparison of event rates; CPH- cox proportional hazard models; LR logistic regression; PR poisson regresson; TT- t-test; Uni- univariate tests; NS- not stated.

**Table D:** association between milk intake and risk of fracture in cohort studies

| Study                          | Fracture <sup>a</sup> /<br>Participa s<br>(n) | Associatin | Grous<br>(n) | Group 1 Risk<br>or daily milk<br>intake <sup>6</sup> | Group 2 Risk<br>or daily milk<br>intake <sup>6</sup> | Group 3 Risk         | Group 4 Risk         | Group 5 Risk         | Range (units) for each<br>group                  |  |
|--------------------------------|-----------------------------------------------|------------|--------------|------------------------------------------------------|------------------------------------------------------|----------------------|----------------------|----------------------|--------------------------------------------------|--|
| <b>All fractures</b>           |                                               |            |              |                                                      |                                                      |                      |                      |                      |                                                  |  |
| Kanis 2005 <sup>45</sup>       | 2469/39563                                    | Nil        | 2            | 1.06 (0.95-<br>1.19)                                 | 1                                                    |                      |                      |                      | <1; 1+ gl/d                                      |  |
| Feart 2013 <sup>66</sup>       | 155/1482                                      | Nil        | 2            | 1.10 (0.79-<br>1.53)                                 | 1                                                    |                      |                      |                      | <0.25; 0.25+ serve/w<br>rarely/never; <1; 1-2.5; |  |
| Cumming 1997 <sup>28</sup>     | 1950/9704                                     | Nil        | 4            | 1                                                    | 1.0 (0.9-1.1)                                        | 1.0 (0.9-1.1)        | 1.0 (0.8-1.2)        |                      | 3+ gl/d                                          |  |
| Michaelsson 2003 <sup>41</sup> | 3986/60689                                    | Nil        | 5            | 1.0 (0.92-1.09)                                      | 1                                                    | 0.99 (0.91-<br>1.08) | 0.96 (0.82-<br>1.12) | 1.12 (0.87-<br>1.43) | 0; 1; 2; 3; 4+ gl/d                              |  |
| <b>Hip fracture</b>            |                                               |            |              |                                                      |                                                      |                      |                      |                      |                                                  |  |
| Gronskag 2010 <sup>60</sup>    | 391/4851                                      | Nil        |              | Milk intake not associated with risk of fracture     |                                                      |                      |                      |                      |                                                  |  |
| Munger 1999 <sup>33</sup>      | 44/32050                                      | Nil        | 2            | 0.15 (0.14)                                          | 0.12 (0.10)                                          |                      |                      |                      | No fracture; fracture                            |  |
| Kanis 2005 <sup>45</sup>       | 413/39563                                     | Nil        | 2            | 1.10 (0.83-<br>1.47)                                 | 1                                                    |                      |                      |                      | <1; 1+ gl/d                                      |  |
| Feart 2013 <sup>66</sup>       | 57/1482                                       | Nil        | 2            | 1.16 (0.67-<br>2.02)                                 | 1                                                    |                      |                      |                      | <0.25; 0.25+ serve/w<br>rarely/never; <1; 1-2.5; |  |
| Cumming 1997 <sup>28</sup>     | 332/9704                                      | Nil        | 4            | 1                                                    | 0.9 (0.7-1.3)                                        | 0.9 (0.7-1.3)        | 0.9 (0.5-1.7)        |                      | 3+ gl/d                                          |  |
| Fujiwara 1997 <sup>29</sup>    | 55/4573                                       | Nil        | 3            | 1                                                    | 1.09 (0.48-<br>2.30)                                 | 0.54 (0.25-<br>1.07) |                      |                      | ≤1; 2-4; 5+ u/w                                  |  |
| Meyer (F) 1997 <sup>30</sup>   | 154/19752                                     | Nil        | 4            | 1                                                    | 0.78 (0.53-<br>1.14)                                 | 0.79 (0.48-<br>1.30) | 0.83 (0.44-<br>1.56) |                      | ≤1; 2; 3; 4+ gl/d                                |  |
| Meyer (M) 1997 <sup>30</sup>   | 56/20035                                      | Inverse    | 4            | 1                                                    | 0.57 (0.27-<br>1.19)                                 | 0.95 (0.48-<br>1.88) | 0.46 (0.22-<br>0.98) |                      | ≤1; 2; 3; 4+ gl/d                                |  |
| Owusu 1997 <sup>31</sup>       | 56/43063                                      | Nil        | 5            | 1                                                    | 0.91 (0.38-<br>2.19)                                 | 1.73 (0.65-<br>4.64) | 1.70 (0.72-<br>4.03) | 0.97 (0.39-<br>2.42) | ≤1; 2-6 gl/w; 1; 1-2.5;<br>>2.5 gl/d             |  |

| Study                               | Fracture <sup>a</sup> /<br>Participa s<br>(n) | Associatin | Grous<br>(n) | Group 1 Risk<br>or daily milk<br>intake <sup>6</sup> | Group 2 Risk<br>or daily milk<br>intake <sup>6</sup> | Group 3 Risk         | Group 4 Risk         | Group 5 Risk         | Range (units) for each<br>group                             |
|-------------------------------------|-----------------------------------------------|------------|--------------|------------------------------------------------------|------------------------------------------------------|----------------------|----------------------|----------------------|-------------------------------------------------------------|
| Feskanich 2003 <sup>40</sup>        | 603/72337                                     | Nil        | 5            | 1                                                    | 1.13 (0.89-<br>1.44)                                 | 0.85 (0.65-<br>1.12) | 1.02 (0.78-<br>1.33) | 0.83 (0.61-<br>1.10) | <1; 1-3.9; 4-6.9 gl/w; 1-<br>1.4 ; 1.5+ gl/d                |
| Michaelsson 2003 <sup>41</sup>      | 1535/60689                                    | Nil        | 5            | 1.03 (0.91-<br>1.17)                                 | 1                                                    | 1.10 (0.97-<br>1.25) | 1.07 (0.86-<br>1.32) | 1.10 (0.76-<br>1.59) | 0; 1; 2; 3; 4+ gl/d                                         |
| Sahni 2013 <sup>69</sup>            | 43/3212                                       | Nil        | 3            | 1                                                    | 0.78 (0.37-<br>1.63)                                 | 0.50 (0.22-<br>1.13) |                      |                      | NS; NS; NS                                                  |
| Sahni 2014 <sup>71</sup>            | 97/764                                        | Nil        | 3            | 1                                                    | 0.61 (0.36-<br>1.08)                                 | 0.58 (0.31-<br>1.06) |                      |                      | ≤1; 2-6; 7+ serve/w                                         |
| <b>Vertebral fracture</b>           |                                               |            |              |                                                      |                                                      |                      |                      |                      |                                                             |
| Roy (M) 2003 <sup>43</sup>          | 80/3173                                       | Nil        | 2            | 1                                                    | 0.74 (0.44-<br>1.26)                                 |                      |                      |                      | <1; 1+ gl/d                                                 |
| Roy (F) 2003 <sup>43</sup>          | 144/3402                                      | Nil        | 2            | 1                                                    | 1.04 (0.71-<br>1.50)                                 |                      |                      |                      | <1; 1+ gl/d                                                 |
| Feart 2013 <sup>66</sup>            | 43/1482                                       | Nil        | 2            | 1.15 (0.60-<br>2.20)                                 | 1                                                    |                      |                      |                      | <0.25; 0.25+ serve/w<br>rarely/never; <1; 1-2.5;<br>3+ gl/d |
| Cumming 1997 <sup>28</sup>          | 389/9704                                      | Nil        | 4            | 1                                                    | 1.1 (0.8-1.5)                                        | 1.3 (0.9-1.7)        | 1.4 (0.8-2.3)        |                      |                                                             |
| Nakamura (M)<br>2009 <sup>e58</sup> | 52/15440                                      | Nil        | 4            | 0.66 (0.30-<br>1.44)                                 | 0.82 (0.39-<br>1.73)                                 | 1.18 (0.58-<br>2.40) | 1                    |                      | <1; 1-2; 3-4, 5+ gl/w                                       |
| Nakamura (W)<br>2009 <sup>e58</sup> | 78/18412                                      | Inverse    | 4            | 1.78 (1.00-<br>3.18)                                 | 1.58 (0.86-<br>2.93)                                 | 1.29 (0.68-<br>2.44) | 1                    |                      | <1; 1-2; 3-4, 5+ gl/w                                       |
| Nakamura (M)<br>2009 <sup>d58</sup> | 82/18910                                      | Nil        | 5            | 1.62 (0.87-<br>3.01)                                 | 1.57 (0.89-<br>2.78)                                 | 0.70 (0.28-<br>1.73) | 1.08 (0.49-<br>2.35) | 1                    | rarely; occasionally; 1-2;<br>3-4; 5+ gl/w                  |
| Nakamura (W)<br>2009 <sup>d58</sup> | 145/22107                                     | Inverse    | 5            | 1.67 (1.08-<br>2.60)                                 | 1.19 (0.76-<br>1.87)                                 | 0.73 (0.37-<br>1.44) | 1.10 (0.67-<br>1.82) | 1                    |                                                             |
| <b>Forearm fracture</b>             |                                               |            |              |                                                      |                                                      |                      |                      |                      |                                                             |
| Feart 2013 <sup>66</sup>            | 73/1482                                       | Nil        | 2            | 0.96 (0.59-<br>1.56)                                 | 1                                                    |                      |                      |                      | <0.25; 0.25+ serve/w                                        |

| Study                      | Fracture <sup>a</sup> /<br>Participa s<br>(n) | Associatin | Grous<br>(n) | Group 1 Risk<br>or daily milk<br>intake <sup>b</sup> | Group 2 Risk<br>or daily milk<br>intake <sup>b</sup> | Group 3 Risk         | Group 4 Risk         | Group 5 Risk         | Range (units) for each<br>group      |
|----------------------------|-----------------------------------------------|------------|--------------|------------------------------------------------------|------------------------------------------------------|----------------------|----------------------|----------------------|--------------------------------------|
| Cumming 1997 <sup>28</sup> | 467/9704                                      | Nil        | 4            | 1                                                    | 1.0 (0.8-1.4)                                        | 1.1 (0.9-1.4)        | 0.8 (0.5-1.4)        |                      | rarely/never; <1; 1-2.5;<br>3+ gl/d  |
| Owusu 1997 <sup>31</sup>   | 201/43063                                     | Nil        | 5            | 1                                                    | 1.09 (0.72-<br>1.67)                                 | 1.13 (0.65-<br>1.96) | 0.95 (0.60-<br>1.51) | 1.06 (0.69-<br>1.62) | ≤1; 2-6 gl/w; 1; 1-2.5;<br>>2.5 gl/d |

<sup>a</sup> Number of participants with fracture

<sup>b</sup> Hazard ratio or Relative Risk (95% confidence interval) or mean (SD) units/d

<sup>c</sup> Cohort 1 in paper. <sup>d</sup> Cohort 2 in paper.

Nil: no association between milk intake and risk of fracture. Inverse: higher milk intake is associated with decreased risk of fracture or lower milk intake is associated with higher risk of fracture.

Abbreviations- SD standard deviation. M- male, F- female. gl- glass, u- unit, serve- serving, d- day, w- week. NS- not stated



**Table E:** association between dairy intake and risk of fracture in cohort studies

| Study                            | Fracture <sup>a</sup> /<br>Participants<br>(n) | Association | Groups<br>(n) | Group 1<br>Risk or<br>daily dairy<br>intake <sup>6</sup> | Group 2<br>Risk or<br>daily dairy<br>intake <sup>6</sup> | Group<br>3 Risk | Group 4<br>Risk  | Group 5<br>Risk  | Range (units) for each<br>group or unit for<br>pooled risk |
|----------------------------------|------------------------------------------------|-------------|---------------|----------------------------------------------------------|----------------------------------------------------------|-----------------|------------------|------------------|------------------------------------------------------------|
| <b>All fractures</b>             |                                                |             |               |                                                          |                                                          |                 |                  |                  |                                                            |
| Thomas-John 2009 <sup>59</sup>   | 41/257                                         | Nil         | 2             | 60 (20)                                                  | 50 (13)                                                  |                 |                  |                  | No fracture; fracture                                      |
| Feart 2013 <sup>66</sup>         | 155/1482                                       | Inverse     | 2             | 1.51 (1.07-2.11)                                         | 1                                                        |                 |                  |                  | <17.6; 17.6+ serve/w<br><42.3; 42.3-70; 70.1-91; 91.1-     |
| Michaelsson 2003 <sup>41</sup>   | 3986/60689                                     | Nil         | 5             | 1.00 (0.90-1.12)                                         | 1.02 (0.92-1.13)                                         | 1               | 0.92 (0.82-1.02) | 0.98 (0.88-1.09) | 117.0; >117 serve/m                                        |
| <b>Hip fracture</b>              |                                                |             |               |                                                          |                                                          |                 |                  |                  |                                                            |
| Sahni 2013 <sup>69</sup>         | 43/3212                                        | Nil         |               | Dairy intake not associated with risk of fracture        |                                                          |                 |                  |                  |                                                            |
| Munger 1999 <sup>33</sup>        | 44/32050                                       | Nil         | 2             | 0.51 (0.27)                                              | 0.48 (0.21)                                              |                 |                  |                  | No fracture; fracture<br>per SD increase                   |
| Huang 1996 <sup>27</sup>         | 130/2513                                       | Nil         |               | 1.05 (0.89-1.24)                                         |                                                          |                 |                  |                  | per quintile increase                                      |
| Benetou 2011 <sup>61</sup>       | 275/29122                                      | Nil         |               | 1.02 (0.93-1.12)                                         |                                                          |                 |                  |                  | per quintile increase                                      |
| Feart 2013 <sup>66</sup>         | 57/1482                                        | Nil         | 2             | 0.95 (0.54-1.68)                                         | 1                                                        |                 |                  |                  | <17.6; 17.6+ serve/w<br><42.3; 42.3-70; 70.1-91; 91.1-     |
| Michaelsson 2003 <sup>41</sup>   | 1535/60689                                     | Nil         | 5             | 1.09 (0.93-1.28)                                         | 1.00 (0.85-1.17)                                         | 1               | 1.17 (1.00-1.37) | 1.10 (0.94-1.29) | 117.0; >117 serve/m                                        |
| <b>Vertebral fracture</b>        |                                                |             |               |                                                          |                                                          |                 |                  |                  |                                                            |
| Domiciano (F) 2014 <sup>70</sup> | 77/449                                         | Nil         | 2             | 471 (809)                                                | 415 (287)                                                |                 |                  |                  | No fracture; fracture                                      |
| Domiciano (M) 2014 <sup>70</sup> | 34/258                                         | Nil         | 2             | 403 (320)                                                | 344 (226)                                                |                 |                  |                  | No fracture; fracture                                      |
| Feart 2013 <sup>66</sup>         | 43/1482                                        | Nil         | 2             | 1.53 (0.79-2.95)                                         | 1                                                        |                 |                  |                  | <17.6; 17.6+ serve/w                                       |
| <b>Forearm fracture</b>          |                                                |             |               |                                                          |                                                          |                 |                  |                  |                                                            |
| Feart 2013 <sup>66</sup>         | 73/1482                                        | Inverse     | 2             | 2.03 (1.22-3.39)                                         | 1                                                        |                 |                  |                  | <17.6; 17.6+ serve/w                                       |

<sup>a</sup> Number of participants with fracture

<sup>b</sup> Hazard ratio or Relative Risk (95% confidence interval) or mean (SD) units/d

Nil: no association between dairy intake and risk of fracture. Inverse: higher dairy intake is associated with decreased risk of fracture or lower dairy intake is associated with higher risk of fracture.

Abbreviations- SD standard deviation. M- male, F- female. serve- serving, w- week, m- month

**Table F:** Association between intake of calcium supplements and risk of fracture in cohort studies

| Study                                | Fracture <sup>a</sup> /<br>Participants<br>(n) | Association | Groups<br>(n) | Group 1 Risk<br>or daily<br>intake of<br>calcium<br>supplements <sup>b</sup> | Group 2 Risk<br>or daily<br>intake of<br>calcium<br>supplements <sup>b</sup> | Group 3<br>Risk      | Group 4<br>Risk      | Group 5<br>Risk      | Cutpoints between each<br>group (mg/d) <sup>c</sup> or unit for<br>pooled risk |
|--------------------------------------|------------------------------------------------|-------------|---------------|------------------------------------------------------------------------------|------------------------------------------------------------------------------|----------------------|----------------------|----------------------|--------------------------------------------------------------------------------|
| <b>All fractures</b>                 |                                                |             |               |                                                                              |                                                                              |                      |                      |                      |                                                                                |
| Cumming 1997 <sup>28</sup>           | 1950/9704                                      | Positive    | 2             | 1                                                                            | 1.1 (1.0-1.2)                                                                |                      |                      |                      | Never used; current calcium use                                                |
| Dargent-Molina 2008 <sup>54</sup>    | 2408/36217                                     | Inverse     | 2             | 1                                                                            | 0.83 (0.72-0.96)                                                             |                      |                      |                      | No calcium use; calcium use                                                    |
| Thomas-John 2009 <sup>59</sup>       | 41/257                                         | Nil         | 2             | 1                                                                            | 1.7 (0.8-3.8)                                                                |                      |                      |                      | No calcium use; calcium use                                                    |
| Prentice 2013 <sup>67</sup>          | NS/29502                                       | Nil         | 2             | 1                                                                            | 0.99 (0.91-1.07)                                                             |                      |                      |                      | No calcium use; calcium use                                                    |
| Prentice 2013 <sup>67</sup>          | NS/39037                                       | Positive    | 2             | 1                                                                            | 1.07 (1.01-1.14)                                                             |                      |                      |                      | No CaD use; CaD use                                                            |
| Samieri 2013 <sup>68</sup>           | 155/1482                                       | Nil         | 2             | 1                                                                            | 2.2 (0.5-3.3)                                                                |                      |                      |                      | No calcium use; calcium use                                                    |
| <b>Hip fracture</b>                  |                                                |             |               |                                                                              |                                                                              |                      |                      |                      |                                                                                |
| Munger 1999 <sup>33</sup>            | 44/32050                                       | Nil         | 2             | 323 (488)                                                                    | 365 (725)                                                                    |                      |                      |                      | No fracture; fracture                                                          |
| Cumming 1997 <sup>28</sup>           | 332/9704                                       | Positive    | 2             | 1                                                                            | 1.5 (1.1-2.0)                                                                |                      |                      |                      | Never used; current calcium use                                                |
| Feskanich 2003 <sup>40</sup>         | 603/72337                                      | Nil         | 2             | 1                                                                            | 1.01 (0.84-1.23)                                                             |                      |                      |                      | No calcium use; current calcium use                                            |
| Koh (F) 2009 <sup>57</sup>           | 692/35241                                      | Positive    | 2             | 1                                                                            | 1.43 (1.01-2.01)                                                             |                      |                      |                      | No calcium use; calcium use                                                    |
| Koh (M) 2009 <sup>57</sup>           | 276/27913                                      | Nil         | 2             | 1                                                                            | 0.84 (0.35-2.05)                                                             |                      |                      |                      | No calcium use; calcium use                                                    |
| Prentice 2013 <sup>67</sup>          | NS/29502                                       | Nil         | 2             | 1                                                                            | 0.82 (0.59-1.14)                                                             |                      |                      |                      | No calcium use; calcium use                                                    |
| Prentice 2013 <sup>67</sup>          | NS/39037                                       | Nil         | 2             | 1                                                                            | 0.88 (0.70-1.11)                                                             |                      |                      |                      | No CaD use; CaD use                                                            |
| Paganini-Hill (F) 1991 <sup>25</sup> | 332/8600                                       | Nil         | 3             | 1                                                                            | 1.45 (0.92-2.30)                                                             | 1.27 (0.79-<br>2.05) |                      |                      | 1; 500                                                                         |
| Paganini-Hill (M) 1991 <sup>57</sup> | 86/5049                                        | Nil         | 3             | 1                                                                            | 1.16 (0.49-2.78)                                                             | 1.11 (0.36-<br>3.41) |                      |                      | 1; 500                                                                         |
| Owusu 1997 <sup>31</sup>             | 56/43063                                       | Nil         | 5             | 1                                                                            | 0.60 (0.20-1.75)                                                             | 1.36 (0.53-<br>3.52) | 1.44 (0.54-<br>3.83) | 1.19 (0.45-<br>3.17) | 300; 375; 460; 605                                                             |
| <b>Vertebral fracture</b>            |                                                |             |               |                                                                              |                                                                              |                      |                      |                      |                                                                                |
| Riggs 1982 <sup>22</sup>             | 107/72                                         | Inverse     | 2             | 1                                                                            | 0.50 (0.33-0.76)                                                             |                      |                      |                      | No calcium use; calcium use                                                    |
| Cumming 1997 <sup>28</sup>           | 389/9704                                       | Positive    | 2             | 1                                                                            | 1.4 (1.1-1.9)                                                                |                      |                      |                      | Never used; current calcium use                                                |

| Study                      | Fracture <sup>a</sup> /<br>Participants<br>(n) | Association | Groups<br>(n) | Group 1 Risk<br>or daily<br>intake of<br>calcium<br>supplements <sup>b</sup> | Group 2 Risk<br>or daily<br>intake of<br>calcium<br>supplements <sup>b</sup> | Group 3<br>Risk | Group 4<br>Risk | Group 5<br>Risk | Cutpoints between each<br>group (mg/d) <sup>c</sup> or unit for<br>pooled risk |
|----------------------------|------------------------------------------------|-------------|---------------|------------------------------------------------------------------------------|------------------------------------------------------------------------------|-----------------|-----------------|-----------------|--------------------------------------------------------------------------------|
| <b>Forearm fracture</b>    |                                                |             |               |                                                                              |                                                                              |                 |                 |                 |                                                                                |
| Cumming 1997 <sup>28</sup> | 467/9704                                       | Nil         | 2             | 1                                                                            | 1.2 (0.9-1.5)                                                                | 0.86 (0.52-     | 1.21 (0.73-     | 0.76 (0.44-     | Never used; current calcium use                                                |
| Owusu 1997 <sup>31</sup>   | 201/43063                                      | Nil         | 5             | 1                                                                            | 0.93 (0.59-1.49)                                                             | 1.43)           | 2.00)           | 1.28)           | 300; 375; 460; 605                                                             |

<sup>a</sup> Number of participants with fracture except for Riggs 1982 which is number of vertebral fractures.

<sup>b</sup> Hazard ratio or Relative Risk (95% confidence interval) or mean (SD) mg/d.

<sup>c</sup> For example, cutpoints of 300; 375; and 460 and 605 indicate 5 groups <300; 300-374; 375-459; 460-605; >605 mg/d

Nil- no association between supplemental calcium intake and risk of fracture. Inverse: higher supplemental calcium intake is associated with decreased risk of fracture or lower supplemental calcium intake is associated with higher risk of fracture. Positive: higher supplemental calcium intake is associated with increased risk of fracture.

Abbreviations- SD standard deviation. M- male, F- female. CaD- co-administered calcium and vitamin D; NS- not stated
