# Supplementary figures and images for: Calcium intake and risk of fracture: systematic review
Source: PubMed Central journal article supplement — BMJ. 2015 Sep 29;351:h4580. doi: 10.1136/bmj.h4580 (PMC4784799; doi:10.1136/bmj.h4580), 2015-09-29

## Appendix 2: Flow of studies [posted as supplied by author]

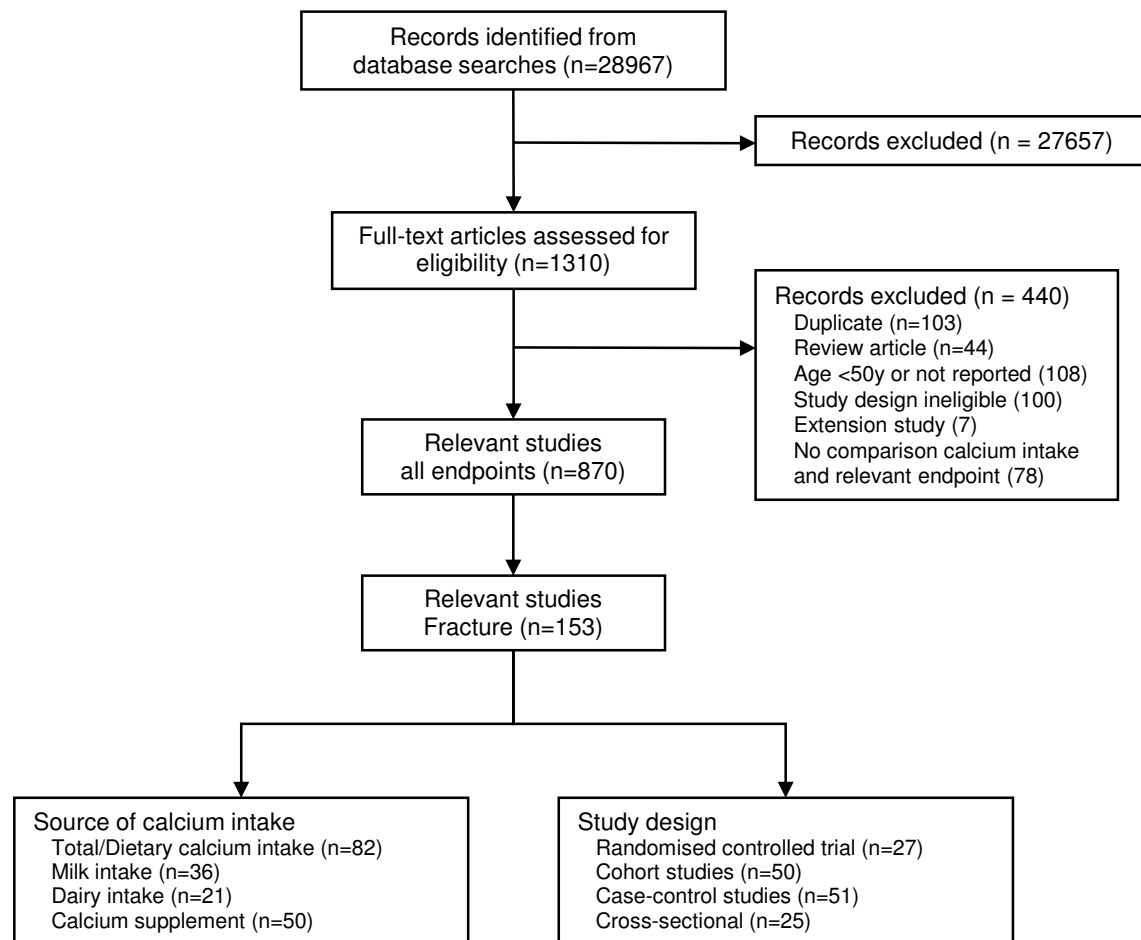

Supplement: bolm026208.ww2_default.pdf [file bolm026208.ww2_default.pdf]
